# Supplementary material for: Trajectories of humoral and cellular immunity and responses to a third dose of mRNA vaccines against SARS-CoV-2 in patients with a history of anti-CD20 therapy
Source: PubMed Central journal article supplement — RMD Open. 2022 Mar 30;8(1):e002166. doi: 10.1136/rmdopen-2021-002166 (PMC8971359; doi:10.1136/rmdopen-2021-002166), 2022-03-30
Supplement: rmdopen-2021-002166supp001.pdf [file rmdopen-2021-002166supp001.pdf]

## Trajectories of humoral and cellular immunity and responses to a third dose of mRNA vaccines against SARS-CoV-2 in patients with a history of anti-CD20 therapy

### Supplement

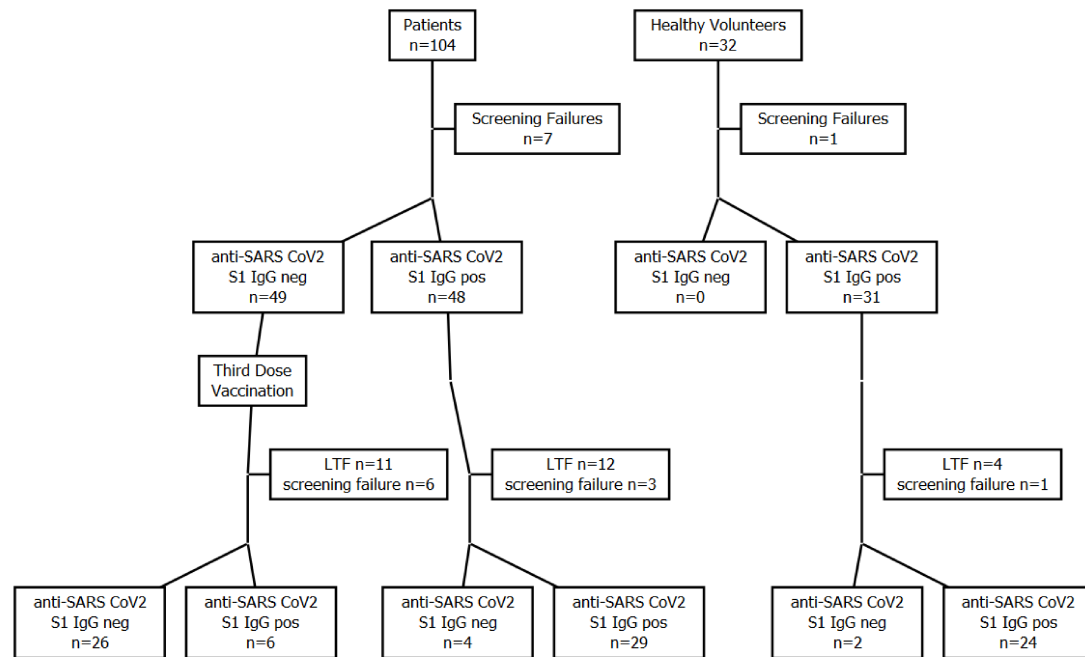

**Supplementary Figure 1:** Flowchart of screening and grouping of patients and healthy volunteers in the RituxiVac study. LTF: lost to follow-up, pos=positive, neg=negative

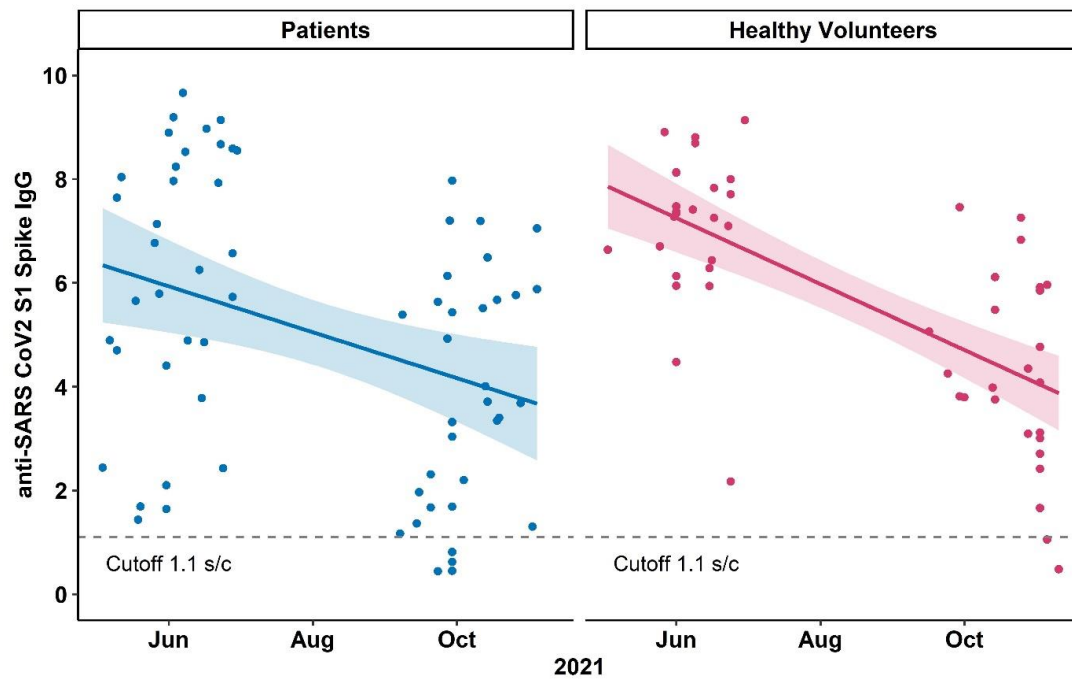

**Supplementary Figure 2:** Linear regression between anti-SARS-CoV-2 S1 IgG concentrations and date of study visit. The shaded area represents the 95% CI for the regression line. Points denote individual values. Each point represents one study visit. The dotted line denotes the cut-off anti-SARS-CoV-2 S1-IgG value of 1.1 (signal to cutoff ratio).

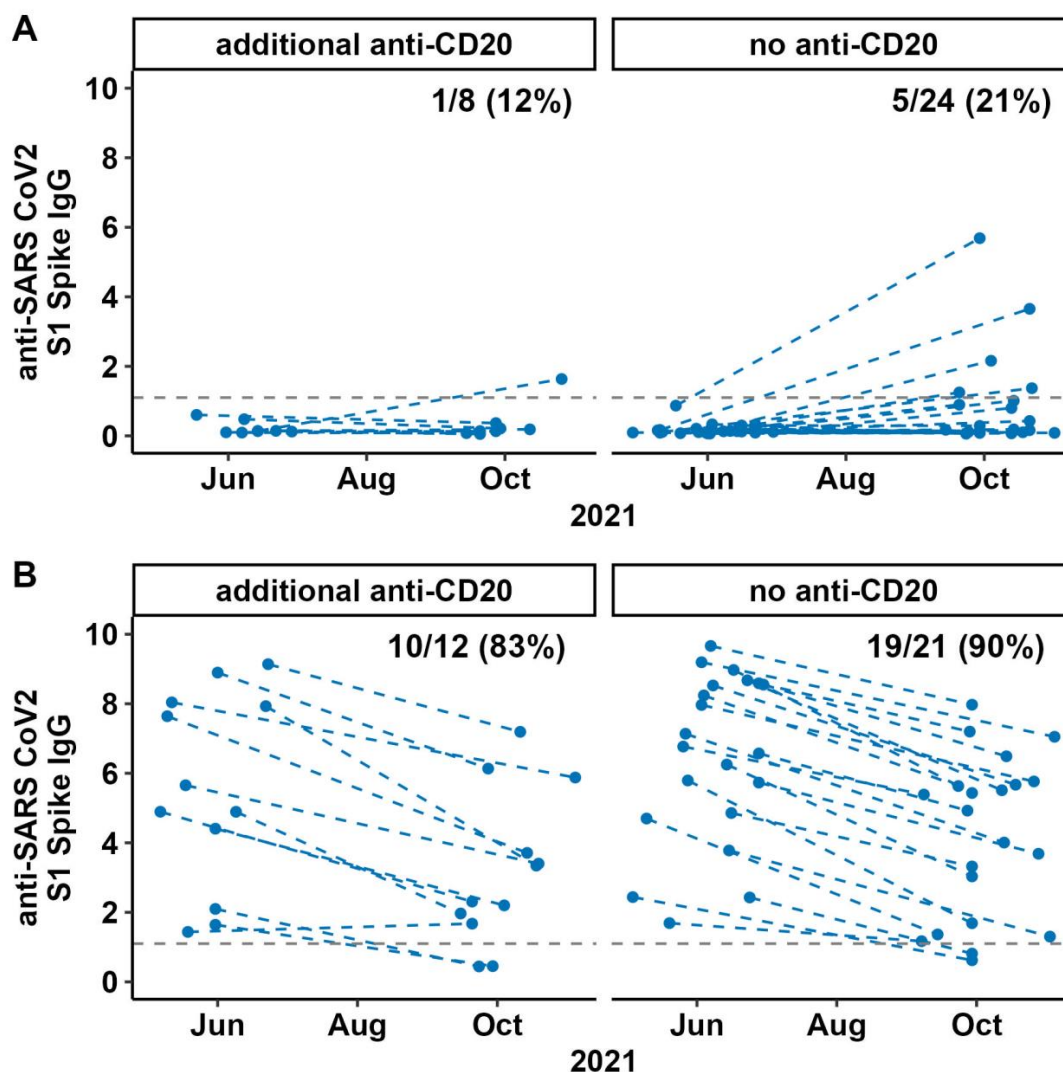

**Supplementary Figure 3:** anti-SARS-CoV-2 S1 Spike IgG levels at study visit 1 and 2 in patients with a third dose vaccination (A, top panel) and patients with a humoral response after two doses (A, bottom panel) in patients with (left) and without (right) anti-CD20 treatment since second vaccination dose. A:  $p > 0.9$ ; B:  $p = 0.6$  (Fisher's Exact test). Each point represents one study visit. Intra-individual values are connected with dashed lines, the later one representing the post-3<sup>rd</sup> vaccination visit (A), or the follow-up visit after two vaccines (B). The dotted grey line denotes the cut-off anti-SARS-CoV-2 S1-IgG value of 1.1 (signal to cutoff ratio).

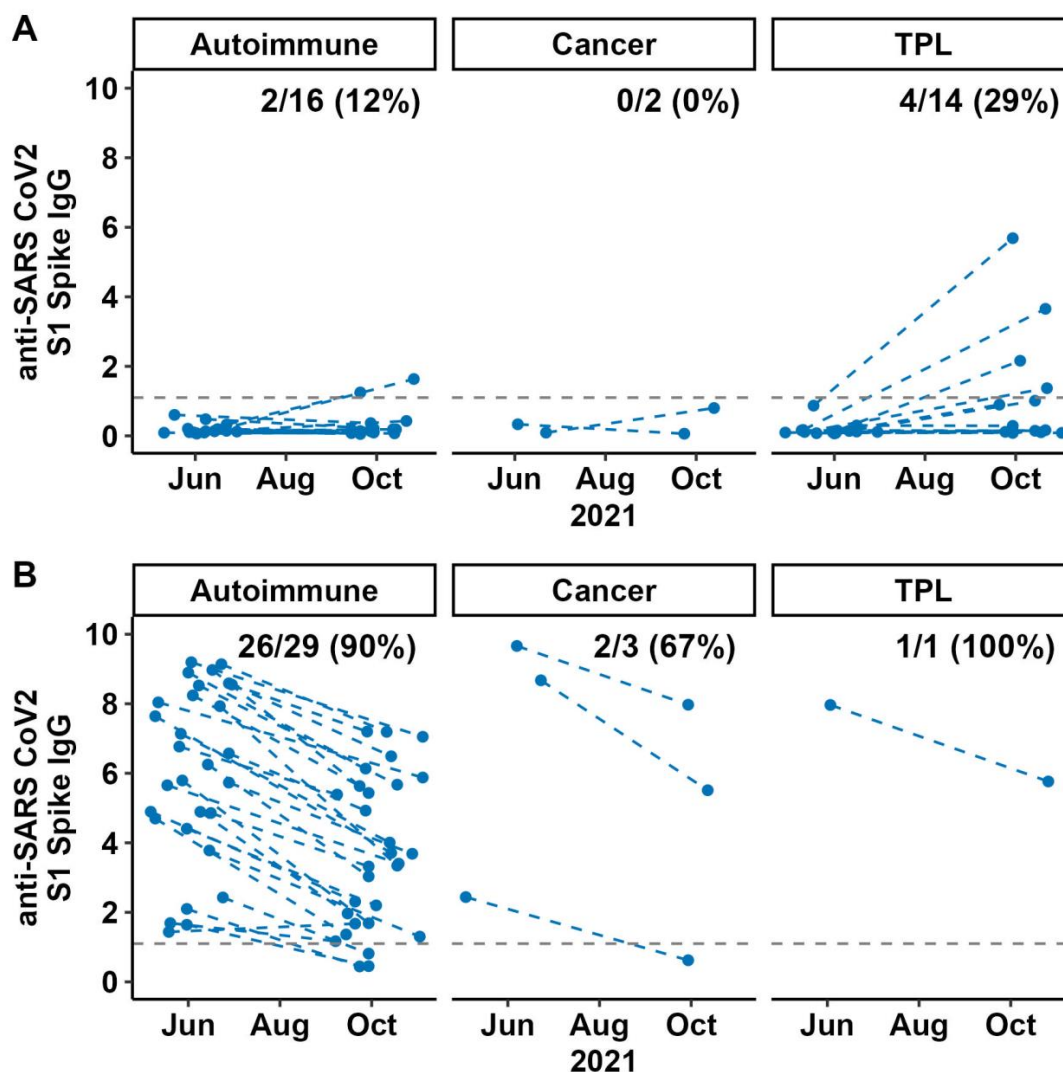

**Supplementary Figure 4:** anti-SARS-CoV-2 S1 Spike IgG levels at study visit 1 and 2 in patients with a third dose vaccination (A, top panel) and patients with a humoral response after two doses (A, bottom panel) dependent on the underlying disease. A:  $p=0.6$ ; B:  $p=0.4$  (Fisher's Exact test). Each point represents one study visit. Intra-individual values are connected with dashed lines, the later one representing the post-3<sup>rd</sup> vaccination visit (A), or the follow-up visit after two vaccines (B). The dotted grey line denotes the cut-off anti-SARS-CoV-2 S1-IgG value of 1.1 (signal to cutoff ratio).

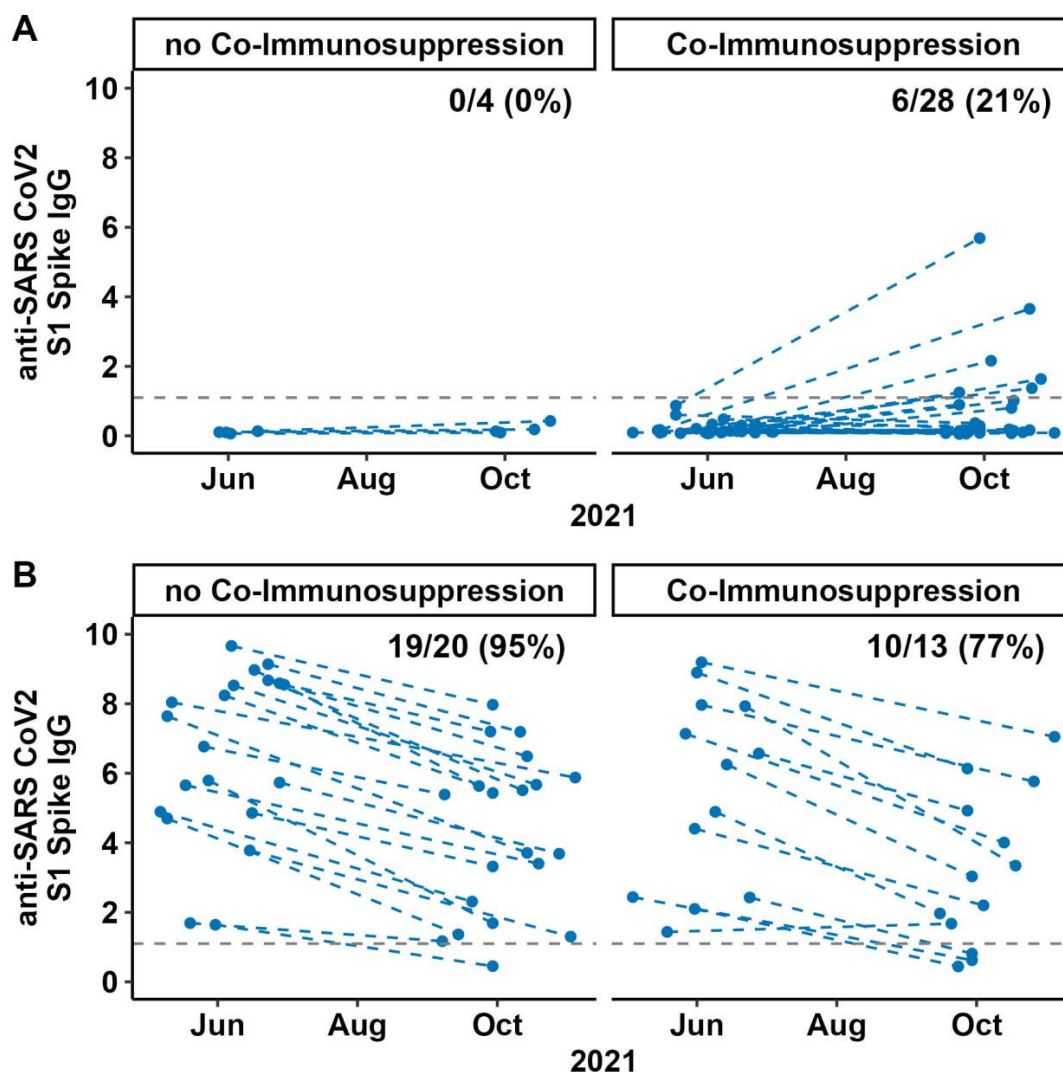

**Supplementary Figure 5.** Anti-SARS-CoV-2 S1 Spike IgG levels at study visit 1 and 2 in patients with a third dose vaccination (A, top panel) and patients with a humoral response after two doses (A, bottom panel) dependent on co-immunosuppressive medication (antimetabolites, calcineurin inhibitors, steroids, biologicals, chemotherapy). A:  $p=0.6$ ; B:  $P=0.3$  (Fisher's Exact test). Each point represents one study visit. Intra-individual values are connected with dashed lines, the later one representing the post-3<sup>rd</sup> vaccination visit (A), or the follow-up visit after two vaccines (B). The dotted grey line denotes the cut-off anti-SARS-CoV-2 S1-IgG value of 1.1 (signal to cutoff ratio).

**Supplementary Table 1: anti-CD20 treatment and vaccination history in patients stratified for underlying disease.**

|                                                                                | <b>Autoimmune</b> | <b>Cancer</b>  | <b>TPL</b>     | <b>Overall</b>    |
|--------------------------------------------------------------------------------|-------------------|----------------|----------------|-------------------|
|                                                                                | <b>n=45</b>       | <b>n=5</b>     | <b>n=15</b>    | <b>n=65</b>       |
| <b>Cumulative anti-CD20 dose before 2nd vaccine (g)</b>                        | 3.0 (2.0, 5.0)    | 2.8 (2.5, 4.3) | 0.6 (0.6, 0.6) | 2.3 (1.0, 4.0)    |
| <b>Anti-CD20 doses since 2nd vaccine (g)</b>                                   | 1.0 (0.5, 1.0)    | -              | -              | 1.0 (0.5, 1.0)    |
| <b>Time between 2nd vaccine to anti-CD20 therapy during follow-up (months)</b> | 5.05 (4.82, 5.43) | -              | -              | 5.05 (4.82, 5.43) |
| <b>Time from last anti-CD20 to 3rd vaccine (months)</b>                        | 0.84 (0.66, 0.85) | -              | -              | 0.84 (0.66, 0.85) |
| <b>Patients having received anti-CD20 treatments during follow-up (n, %)</b>   | 20/45 (44%)       | 0/5 (0%)       | 0/15 (0%)      | 20/65 (31%)       |

**Supplementary Table 2:** Bivariate analyses of anti-SARS-CoV-2 IgG persistence and third dose humoral response for sets of clinical or laboratory variables important for immune competence in patients with a history of anti-CD20 therapy as independent variables. Positive indicates anti-SARS-CoV-2 IgG above 1.1 (s/c ratio) at V2 visit. Data are presented as median (interquartile range) or counts (frequency of group).

|                                 | Two-Dose humoral responders      |                                         |         | Two-Dose humoral non-responders             |                                          |         |
|---------------------------------|----------------------------------|-----------------------------------------|---------|---------------------------------------------|------------------------------------------|---------|
|                                 | Loss of anti-S1 IgG in follow-up | Persistence of anti-S1 IgG in follow-up |         | No humoral response to 3 <sup>rd</sup> dose | Humoral response to 3 <sup>rd</sup> dose |         |
|                                 | n=4                              | n=29                                    | p-value | n=26                                        | n=6                                      | p-value |
| Male sex (%)                    | 1 (25%)                          | 14 (48%)                                | 0.6     | 14 (54%)                                    | 4 (67%)                                  | 0.7     |
| Median age (years)              | 76 (70, 79)                      | 66 (53, 70)                             | 0.2     | 66 (54, 72)                                 | 58 (43, 71)                              | 0.5     |
| Immunosuppression (%)           | 3 (75%)                          | 10 (34%)                                | 0.3     | 22 (85%)                                    | 6 (100%)                                 | 0.6     |
| Vaccine (BioNTech/Pfizer) (%)   | 3 (75%)                          | 14 (48%)                                | 0.6     | 19 (73%)                                    | 5 (83%)                                  | >0.9    |
| Cumulative dose anti-CD20 (g)   | 3.63 (2.75, 4.45)                | 3.50 (2.40, 5.35)                       | 0.8     | 2.00 (0.74, 3.45)                           | 0.65 (0.65, 1.66)                        | 0.13    |
| CD4 cells (cells/ $\mu$ l)      | 748 (720, 1,126)                 | 949 (658, 1,048)                        | 0.9     | 624 (350, 905)                              | 638 (427, 814)                           | >0.9    |
| CD19 cells (cells/ $\mu$ l)     | 34 (26, 45)                      | 51 (24, 176)                            | 0.5     | 3 (0, 21)                                   | 52 (15, 92)                              | 0.052   |
| V1 anti-SARS-CoV-2 S1 IgG       | 2.26 (1.98, 2.43)                | 7.14 (4.89, 8.55)                       | 0.002   | 0.12 (0.09, 0.15)                           | 0.16 (0.14, 0.29)                        | 0.069   |
| V1 IFN $\gamma$ release (mU/ml) | 0.15 (0.05, 0.42)                | 0.25 (0.13, 0.70)                       | 0.5     | 0.01 (0.00, 0.14)                           | 0.02 (0.01, 0.10)                        | 0.5     |
